# Supplementary material for: Correlation Analysis between Household Hygiene and Sanitation and Nutritional Status and Female Leprosy in Gresik Regency
Source: Dermatol Res Pract. 2020 Sep 30;2020:4379825. doi: 10.1155/2020/4379825 (PMC7545468; doi:10.1155/2020/4379825)
Supplement: Supplementary Materials — The questionnaire data used to support the findings of this study are included within the supplementary information files. [file 4379825.f1.xlsx]

## Sheet: DATA KOMPILASI JURNAL
Name	Leprosy Status	Enviroment	Water Facilities	Nutritional Status	Personal Hygiene	Toilet Availability	Wastewater Facility	Waste Disposal
antika ari	1	1	0	2	2	1	0	0
siti imaro	1	0	1	2	1	1	0	1
riana	1	0	0	2	2	1	0	0
ulfiyatin	1	0	1	2	1	1	1	0
siti khusn	1	0	0	1	2	1	0	0
dewi wijay	1	1	0	1	1	1	1	0
yuni isma	1	1	1	2	2	1	0	0
siti muali	1	0	0	1	2	1	0	0
suwarni	1	1	1	1	1	1	0	0
susilowati	1	1	1	2	1	1	0	0
sumaiyah	1	1	0	1	2	1	0	0
ririn riow	1	0	0	2	1	0	0	0
nanik said	1	1	1	1	1	1	0	0
siti aisya	1	0	0	2	2	1	0	0
toyyibah	1	1	1	2	2	1	0	0
luluk	1	1	0	1	1	0	0	1
sumartik	1	0	0	2	2	1	0	1
nasihatul	1	0	1	2	2	1	0	1
eniswati	1	0	0	1	2	0	0	0
nanik safi	1	1	1	2	2	1	1	0
marmi	1	1	0	1	1	0	0	0
nanik hida	1	1	0	2	1	1	1	0
satumi	1	0	0	1	2	0	1	0
suwalifah	1	1	1	2	2	1	0	1
sri umiyat	1	1	1	1	2	1	0	0
marliah	1	1	0	2	2	0	0	0
masruroh	1	0	0	1	1	1	1	1
siti salik	1	1	0	1	1	0	0	1
marifah	1	1	1	2	2	1	0	0
nurkhamida	1	0	1	2	1	1	0	0
manninten	1	1	0	1	1	1	0	0
tiari	1	0	1	2	2	1	0	0
maryanih	1	0	0	2	1	0	0	0
siti masru	1	1	1	2	1	0	1	0
musliani	1	0	1	1	2	1	0	1
indah	1	0	1	1	2	0	0	0
khoirun ni	1	1	1	2	1	0	0	0
raihatun j	0	1	1	2	2	0	0	1
ina	0	1	1	1	2	1	0	1
aliyatun n	0	1	0	2	2	0	0	0
zuwartin	0	0	1	2	2	1	0	1
nurul faiz	0	1	0	2	2	1	0	1
lili oktav	0	1	1	2	2	1	1	0
ummu fadhi	0	1	1	2	2	1	0	1
maulida	0	1	1	2	2	1	0	0
dwi lisaya	0	1	1	2	2	1	1	0
lili hamid	0	1	1	2	2	1	0	0
supaniyati	0	1	1	1	2	1	0	0
mistutik	0	1	1	2	2	1	0	0
romalia ar	0	1	1	2	2	1	0	0
muhamadyah	0	1	0	2	2	1	0	0
suparti	0	1	1	1	2	1	1	1
nur khaila	0	1	1	2	2	1	1	1
asiah	0	1	1	2	2	1	1	1
asroriyah	0	0	1	2	2	1	0	1
eny munist	0	1	1	2	2	1	0	0
ismudah	0	1	1	2	2	1	0	1
siti muafi	0	1	1	1	2	1	1	0
nimatun ni	0	1	1	2	2	1	1	0
sri kustin	0	1	0	1	2	1	0	0
afwah	0	1	1	2	2	1	0	0
tini	0	1	1	2	2	1	0	0
tutik	0	1	0	1	2	1	0	0
nur faridh	0	1	1	1	2	0	0	1
fidatin	0	1	1	2	2	1	0	0
lyfahu khu	0	0	1	2	2	1	0	1
hani	0	1	1	1	2	1	0	1
siti nafil	0	1	0	2	2	1	0	0
juanifa	0	1	1	2	2	1	0	0
rakhmatu k	0	1	0	1	2	1	1	1
riska	0	1	1	2	2	1	1	1
umi soliha	0	1	1	2	2	1	1	1
fitri	0	1	0	2	2	1	1	1
atik	0	1	1	2	2	1	1	1
